# Supplementary material for: Oleic acid-induced, controllable surface oxidation to enhance the photoresponse performance of Sb2Se3 nanorods
Source: Royal Society of Chemistry journal article supplement (doi:10.1039/d0ce00810a), 2020-01-01
Supplement: d0ce00810a1.pdf [file d0ce00810a1.pdf]

Electronic Supplementary Information (ESI)

**Oleic acid-induced, controllable surface oxidation to enhance the photoresponse performance of  $\text{Sb}_2\text{Se}_3$  nanorods**

Fan Guan<sup>a</sup>, Linjie Li<sup>a</sup>, Yusong Cui<sup>a</sup>, Tingting Wang<sup>a,\*</sup>, Shaopeng Li<sup>a</sup>, Longhua Li<sup>b</sup>, Junhao Zhang<sup>c</sup> and Junli Wang<sup>a,\*</sup>

<sup>a</sup>*School of Materials Science & Engineering, Jiangsu University, Zhenjiang 212013, PR China. E-mail: wangjl@ujs.edu.cn; tingtingwang12@163.com.*

<sup>b</sup>*School of Chemistry & Chemical Engineering, Jiangsu University, Zhenjiang 212013, PR China*

<sup>c</sup>*School of Environmental and Chemical Engineering, Jiangsu University of Science and Technology, Zhenjiang 212003, PR China*

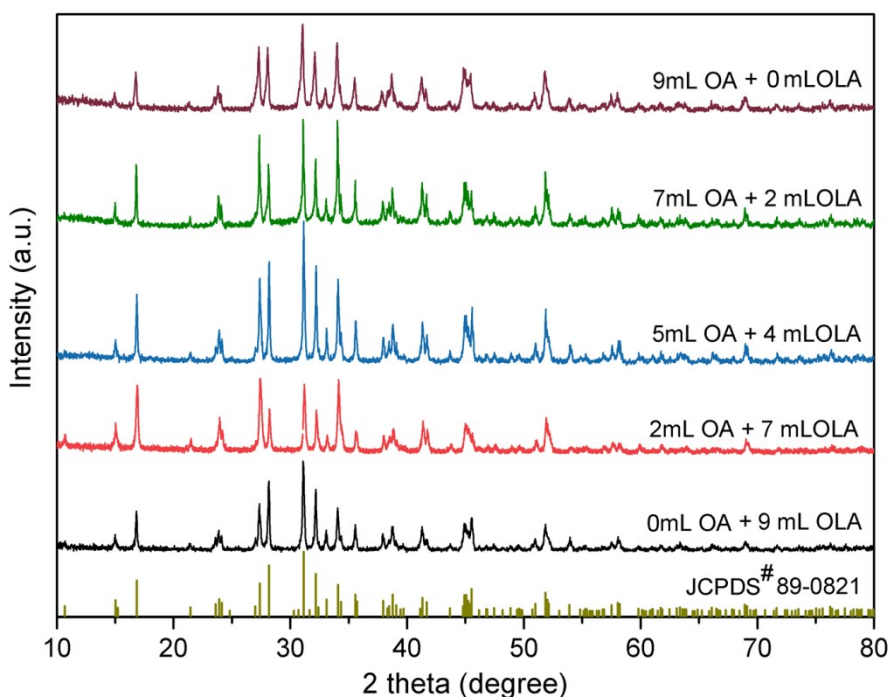

**Fig. S1** XRD patterns of  $\text{Sb}_2\text{Se}_3$  samples synthesized from different volume ratios of oleic acid (OA)/oleylamine (OLA) as labeled in the figure. The standard diffraction lines (JCPDS# 89-0821) are shown at the bottom for clear comparison.

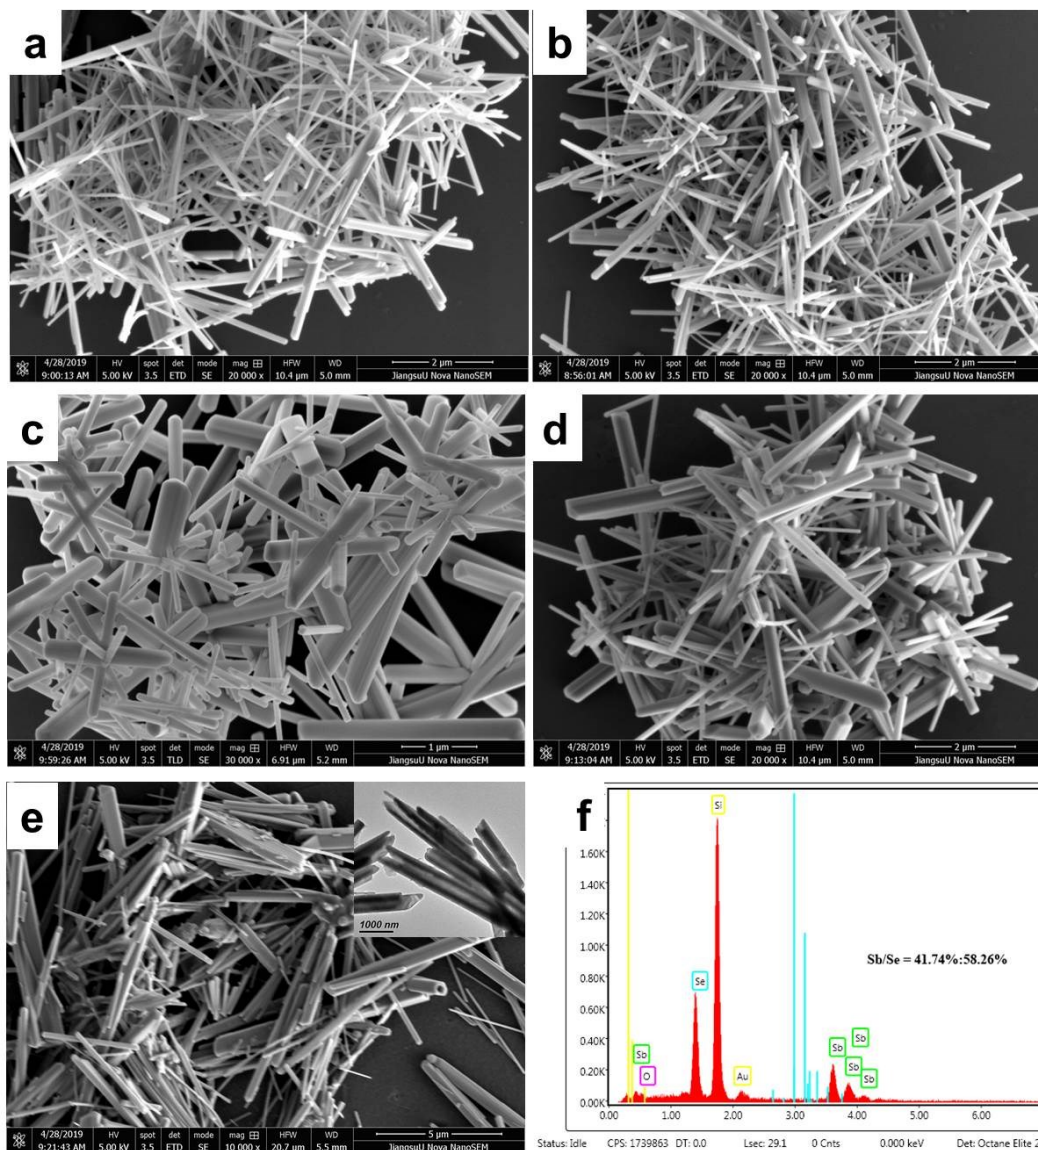

**Fig.S2** SEM images of  $\text{Sb}_2\text{Se}_3$  samples prepared using different OA/OLA volume ratios (the total volume of the solution was kept at 9 mL): (a) 0:9, (b) 2:7, (c) 5:4, (d) 7:2, and (e) 9:0; (f) EDS spectrum of  $\text{Sb}_2\text{Se}_3$  NRs prepared using 5:4 OA/OLA ratio. Generally, all the samples synthesized in the pure oleylamine or the OA/oleylamine mixture are rod-like while the  $\text{Sb}_2\text{Se}_3$  sample prepared in pure OA is a mixture of nanorods and nanotubes (panel e and the TEM image inserted).

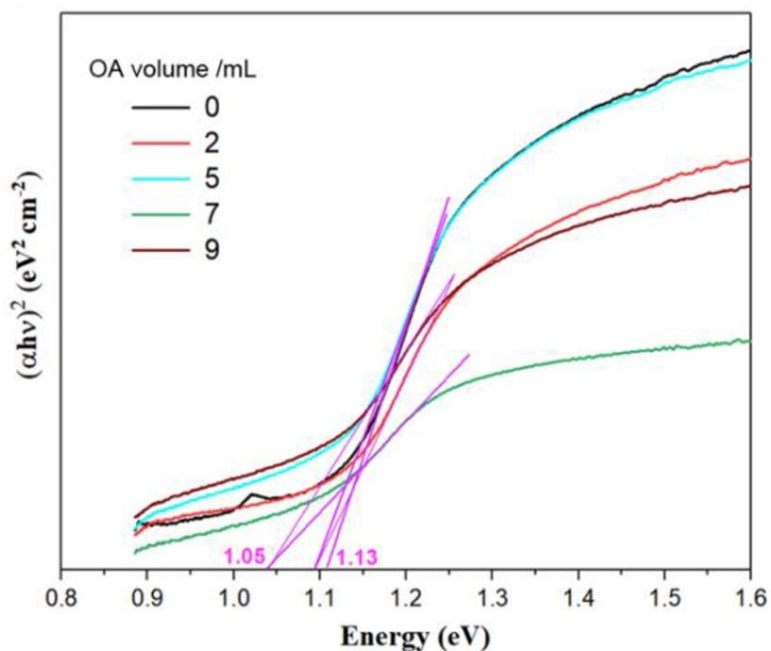

**Fig. S3** Tauc fitting plots of UV-visible-NIR absorption spectra for  $\text{Sb}_2\text{Se}_3$  NRs prepared using different OA/OLA volume ratios.

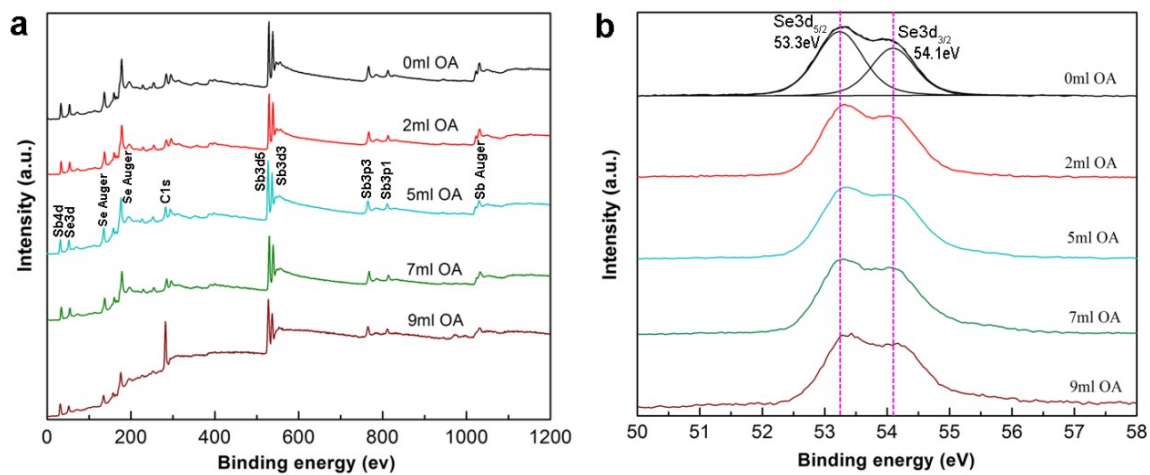

**Fig. S4** (a) Survey XPS spectra and (b) High-resolution of Se 3d core-level XPS spectra of  $\text{Sb}_2\text{Se}_3$  samples prepared using different OA/OLA volume ratios.

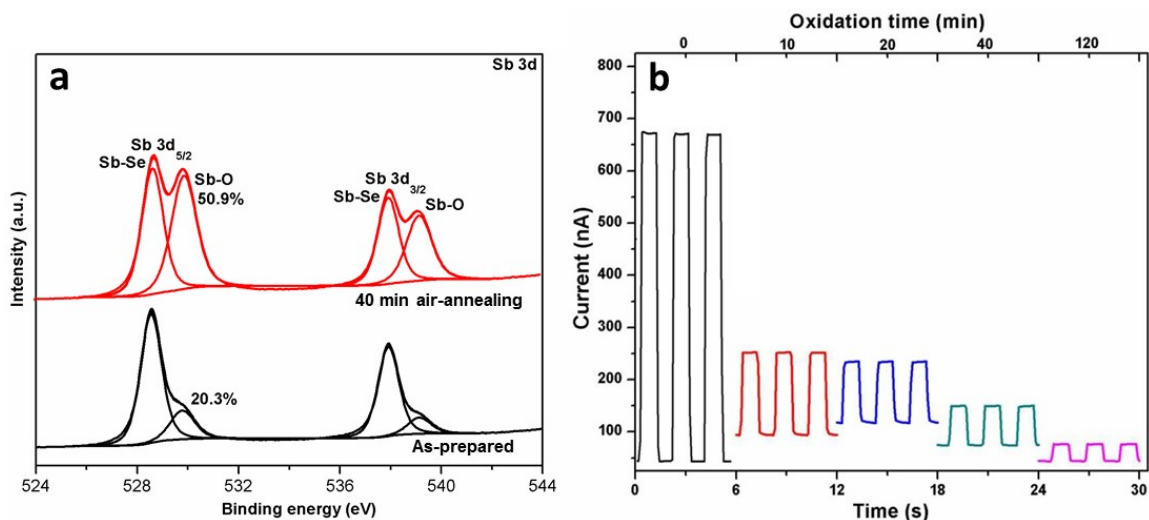

**Fig. S5** (a) Sb 3d XPS spectra of as-prepared and 40-min air-annealed  $\text{Sb}_2\text{Se}_3$  NRs; (b) Photoresponse I-t curves for  $\text{Sb}_2\text{Se}_3$  NRs with different air-annealing oxidation times at 200 °C. I-t curves were recorded under white-light illumination at 1 V bias. The  $\text{Sb}_2\text{Se}_3$  NRs were prepared at 5:4 OA/OLA volume ratio.



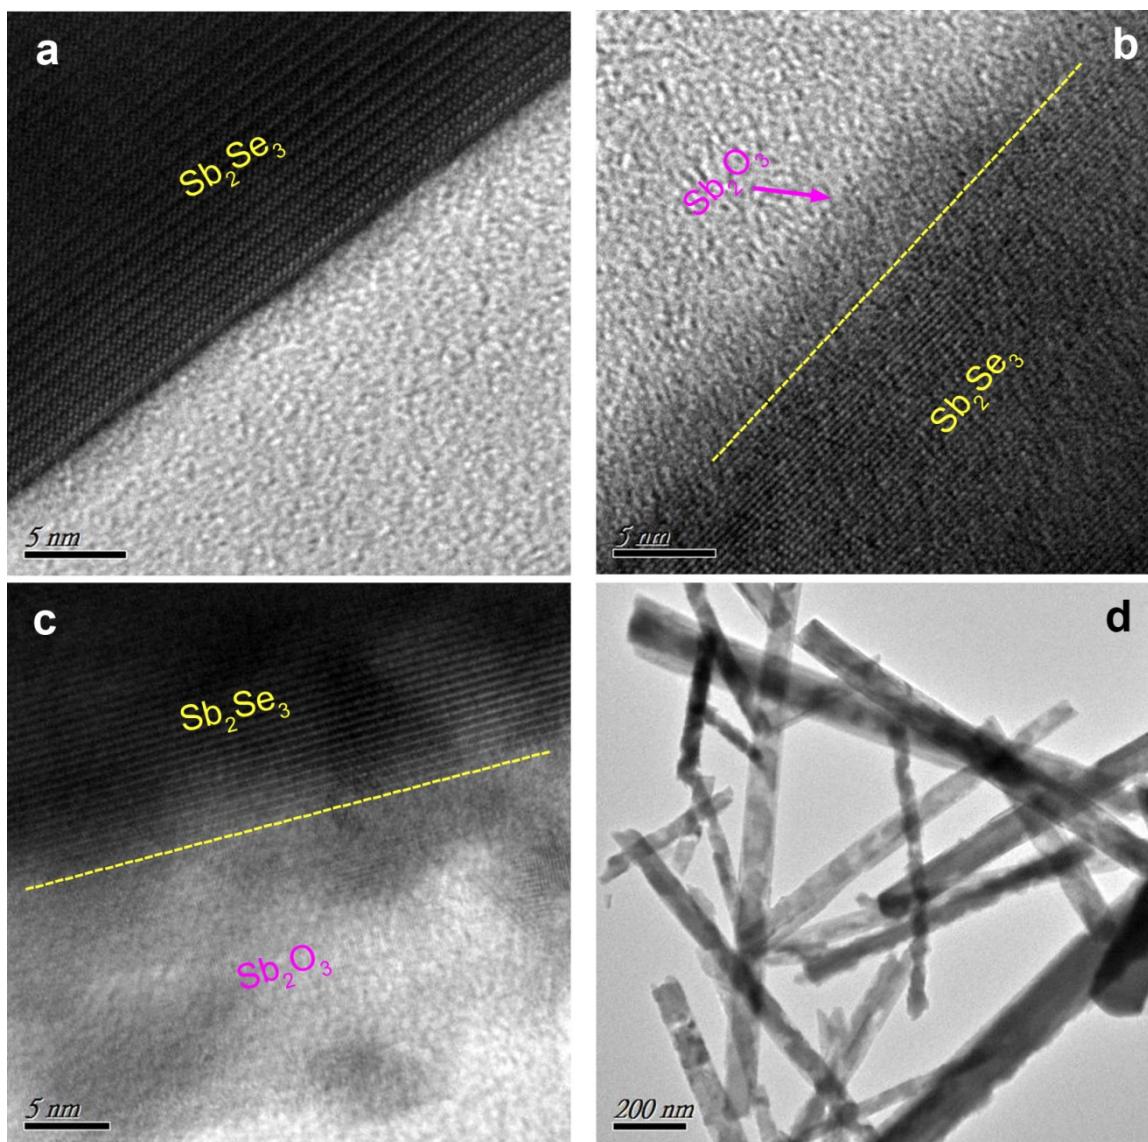

**Fig. S6** (a–c) HRTEM images of  $\text{Sb}_2\text{Se}_3$  NRs with different air-annealing times at 200 °C: (a) 0 min, (b) 40 min and (c) 2 h; an increase of the surface oxidation level or the formation of a surface oxide layer is clearly observed with the increase of air-annealing time. (d) TEM image of  $\text{Sb}_2\text{Se}_3$  NRs obtained after 2 h air-annealing, showing some of the NRs begin to decompose. The  $\text{Sb}_2\text{Se}_3$  NRs were prepared at 5:4 OA/OLA volume ratio.
